# Supplementary material for: Charge and adsorption height dependence of the self-metalation of porphyrins on ultrathin MgO(001) films
Source: Royal Society of Chemistry journal article supplement (doi:10.1039/d2cp04688a), 2022-01-01
Supplement: d2cp04688a1.pdf [file d2cp04688a1.pdf]

Supporting Information for

## Charge and adsorption height dependence of the self-metalation of porphyrins on ultrathin MgO(001) films

Francesco Presel,<sup>1</sup> Christian S. Kern,<sup>1</sup> Thomas G. Boné,<sup>1</sup> Florian Schwarz,<sup>1</sup> Peter Puschnig,<sup>1</sup> Michael G. Ramsey,<sup>1</sup> Martin Sterrer<sup>1</sup>

<sup>1</sup>Institute of Physics, NAWI Graz, University of Graz, Universitätsplatz 1, 8010 Graz, Austria.

### SI1: XPS of a partially populated second 2H-P layer

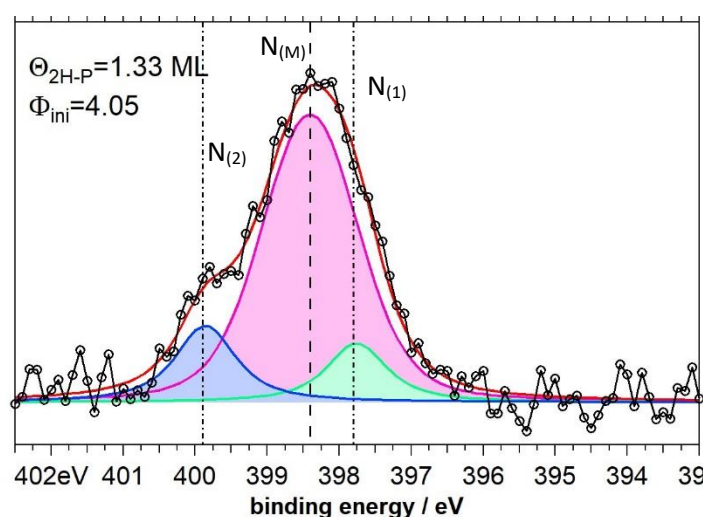

**Figure SI1.** XP spectrum of 1.33 ML 2H-P on high- $\Phi$  2 ML MgO(001)/Ag(001). The spectrum has been fitted with three peaks, corresponding to the 4 equivalent N atoms in metalated MgP ( $N_{(M)}$ , BE = 398.4 eV) and the iminic ( $N_{(1)}$ , BE = 397.8 eV) and aminic ( $N_{(2)}$ , BE = 399.8 eV) N atoms in unmetalated 2H-P, which grows on top of the metalated monolayer.

## SI2: XPS of O 1s region before and after 2H-P deposition

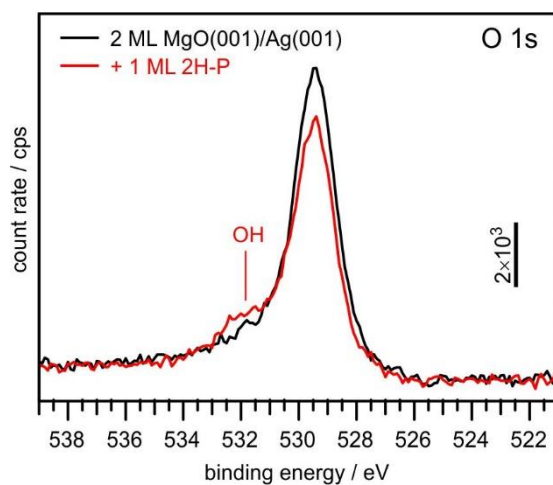

**Figure SI2.** O 1s XP spectrum of clean 2 ML MgO(001)/Ag(001) (black) and of the same surface after deposition of 1 ML 2H-P (red). In addition to the attenuation of the main O 1s signal from the MgO film (529.5 eV), a shoulder grows in at higher binding energy (532 eV), which is associated with the formation of hydroxyl groups. [SI1]

### SI3: Computational results for 2H-P and Mg-P at high coverage

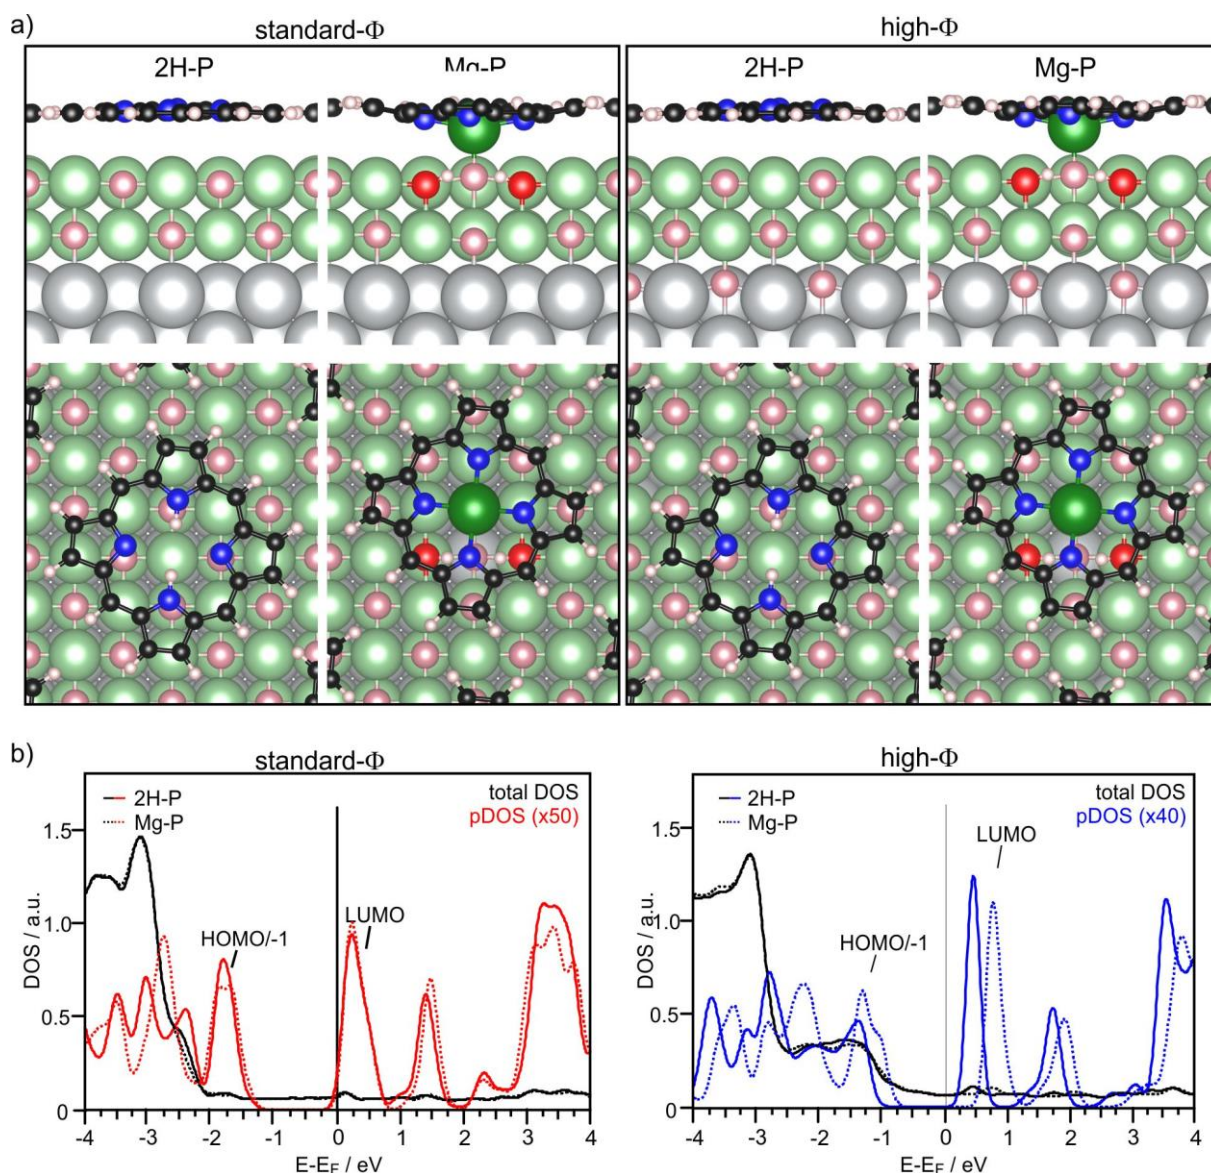

**Figure SI3.** a) Side views and top views of the DFT (optb86b)-optimized geometry for 2H-P and Mg-P on standard- $\Phi$  (left panel) and high- $\Phi$  (right panel) 2 ML MgO(001)/Ag(001). Colors: grey: Ag; pink: O; red: O of OH; green: Mg; black: C; blue: N; white: H. Note that the high  $\Phi$  was obtained by adding  $\frac{1}{4}$  ML O at interstitial sites of the interfacial Ag layer. b) Calculated density of states (DOS) for 2H-P (full lines) and Mg-P (dotted lines) on standard- $\Phi$  (left panel) and high- $\Phi$  (right panel) 2 ML MgO(001)/Ag(001). The black and colored lines represent the total DOS and the DOS projected onto the C atoms of 2H-P/Mg-P (enhanced by a factor of 50), respectively.

### References

[SI1] G. Di Filippo, A. Classen, R. Pöschel and Thomas Fauster, *J. Chem. Phys.*, 2017, **146**, 064702.
